# Supplementary material for: Screening of Methylation Gene Sites as Prognostic Signature in Lung Adenocarcinoma
Source: PubMed Central journal article supplement — Yonsei Med J. 2020 Nov 25;61(12):1013–23. doi: 10.3349/ymj.2020.61.12.1013 (PMC7700873; doi:10.3349/ymj.2020.61.12.1013), 2020-11-25
Supplement: ymj-61-1013-s001.pdf [file ymj-61-1013-s001.pdf]

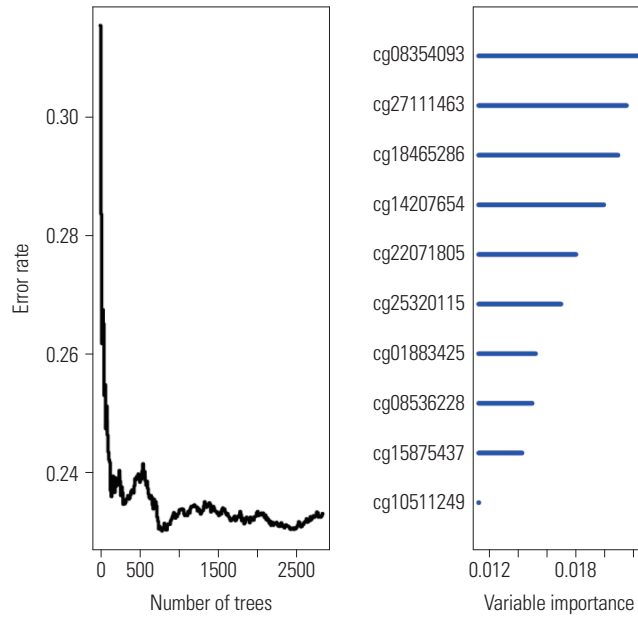

**Supplementary Fig. 1.** Ten gene sites related to the overall survival were selected according to the permutation importance score using the random survival forests-variable hunting algorithm. The error rate was the lowest.
