# Supplementary material for: Screening of Methylation Gene Sites as Prognostic Signature in Lung Adenocarcinoma
Source: PubMed Central journal article supplement — Yonsei Med J. 2020 Nov 25;61(12):1013–23. doi: 10.3349/ymj.2020.61.12.1013 (PMC7700873; doi:10.3349/ymj.2020.61.12.1013), 2020-11-25
Supplement: ymj-61-1013-s002.pdf [file ymj-61-1013-s002.pdf]

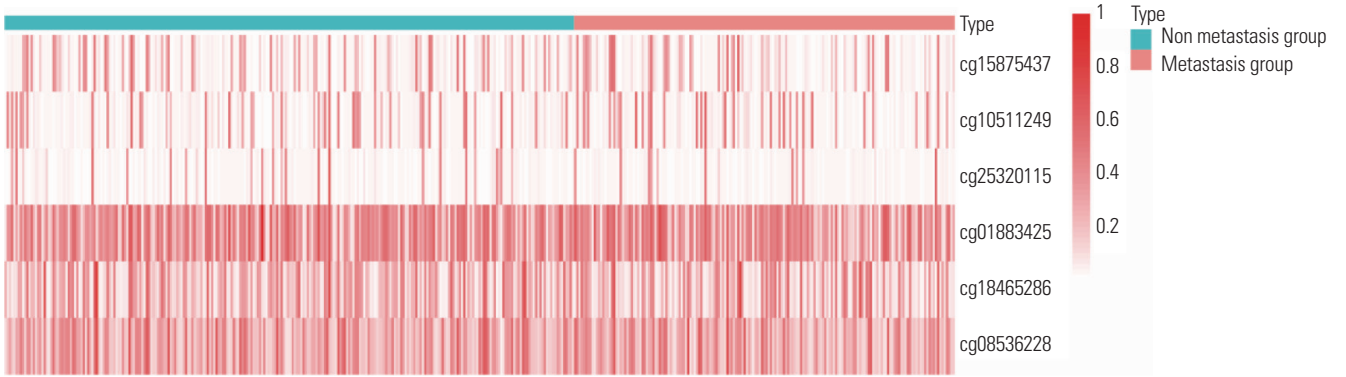

**Supplementary Fig. 2.** The relationship between the methylated sites signature and metastasis group and the non-metastasis group.
