# Supplementary material for: Screening of Methylation Gene Sites as Prognostic Signature in Lung Adenocarcinoma
Source: PubMed Central journal article supplement — Yonsei Med J. 2020 Nov 25;61(12):1013–23. doi: 10.3349/ymj.2020.61.12.1013 (PMC7700873; doi:10.3349/ymj.2020.61.12.1013), 2020-11-25
Supplement: ymj-61-1013-s004.pdf [file ymj-61-1013-s004.pdf]

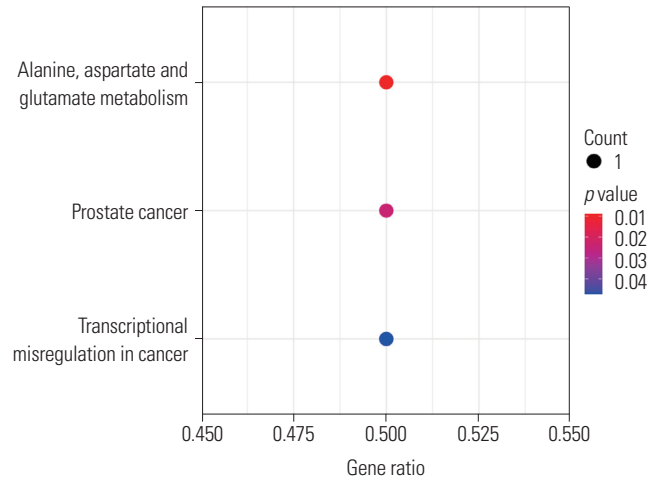

**Supplementary Fig. 3.** KEGG analysis of signature genes. These genes are mainly involved in the pathways of alanine, aspartate, and glutamate metabolism and transcriptional misregulation in cancer.
